# Supplementary material for: Star polymer–TiO2 nanohybrids to effectively modify the surface of PMMA dielectric layers for solution processable OFETs
Source: Royal Society of Chemistry journal article supplement (doi:10.1039/d0tc03137b), 2020-12-12
Supplement: d0tc03137b1.pdf [file d0tc03137b1.pdf]

## SUPPLEMENTARY INFORMATION

### Star polymers -TiO<sub>2</sub> nanohybrids to effectively modify surface of PMMA dielectric layer for solution processable OFETs

Katarzyna Budzalek<sup>a</sup>, Hangjun Ding<sup>b</sup>, Lukasz Janasz<sup>a</sup>, Aleksandra Wypych-Puszkarz<sup>a</sup>, Onur Cetinkaya<sup>a</sup>, Joanna Pietrasik<sup>c</sup>, Marcin Kozanecki<sup>a</sup>, Jacek Ulanski<sup>a</sup>, Krzysztof Matyjaszewski<sup>\*a,b</sup>

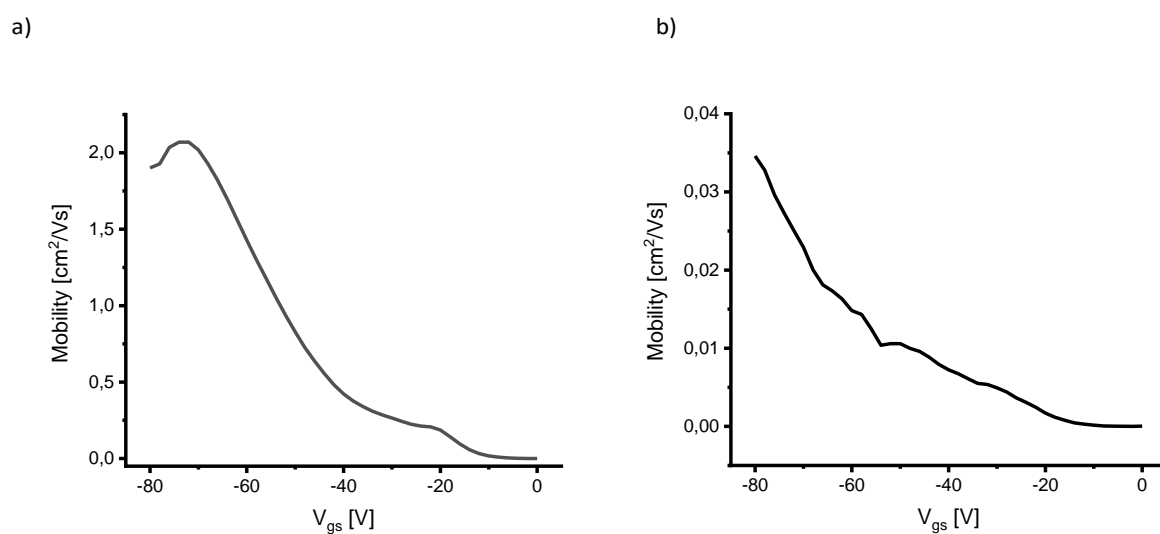

Figure S1. OFET mobility vs. gate voltage dependences for devices with different dielectric layer: a) PMMA containing TiO<sub>2</sub>@PSAN-*b*-PAA-PDVB nanohybrids; b) neat PMMA layer

<sup>a</sup> Department of Molecular Physics, Faculty of Chemistry, Lodz University of Technology, Zeromskiego 116, 90-924 Lodz, Poland.

<sup>b</sup> Department of Chemistry, Carnegie Mellon University, 5000 Forbes Avenue, Pittsburgh, PA 15213, USA.

<sup>c</sup> Institute of Polymer and Dye Technology, Faculty of Chemistry, Lodz University of Technology, Stefanowskiego 12/16, 90-924 Lodz, Poland

See DOI: 10.1039/x0xx00000x
